# Supplementary material for: Transcriptome Analysis of Sunflower Genotypes with Contrasting Oxidative Stress Tolerance Reveals Individual- and Combined- Biotic and Abiotic Stress Tolerance Mechanisms
Source: PubMed Central journal article supplement (PMC4912118; doi:10.1371/journal.pone.0157522), 2016-06-17
Supplement: pone.0157522.s007.pdf [file pone.0157522.s007.pdf]

GO:0008150  
biological\_process

GO:0051179  
localization

GO:0009987  
cellular process

GO:0008152 (0.00111)  
metabolic process  
144/367 | 10614/37767

GO:0051234  
establishment of  
localization

GO:0044281  
small molecule  
metabolic process

GO:0044237  
cellular metabolic  
process

GO:0006807  
nitrogen compound  
metabolic process

GO:0044238  
primary metabolic  
process

GO:0043170  
macromolecule metabolic  
process

GO:0055114 (4.09e-15)  
oxidation reduction  
24/367 | 203/37767

GO:0006810  
transport

GO:0034641 (0.00111)  
cellular nitrogen  
compound metabolic process  
18/367 | 506/37767

GO:0005975  
carbohydrate metabolic  
process

GO:0044260  
cellular macromolecule  
metabolic process

GO:0019538  
protein metabolic  
process

GO:0055085 (0.00165)  
transmembrane transport  
12/367 | 244/37767

GO:0006066  
alcohol metabolic  
process

GO:0044262  
cellular carbohydrate  
metabolic process

GO:0044267  
cellular protein  
metabolic process

GO:0043412  
macromolecule modification

GO:0005996 (0.0435)  
monosaccharide metabolic  
process  
8/367 | 168/37767

GO:0006464  
protein modification  
process

GO:0043687 (0.0435)  
post-translational protein  
modification  
26/367 | 1248/37767

Figure S7. Mapping of upregulated genes based on biological functions. The sunflower GO IDs were used to map using Agrigo software analysis. The colour code of rectangle boxes indicate significance levels yellow=1 and Red=9, Red arrow lines- Positive regulate, green arrow lines= negative regulate, purple line= regulate, yellow line= part of, black dotted lines one or two significant node.
